# Supplementary material for: Nonuniform growth and topological defects in the shaping of elastic sheets
Source: Royal Society of Chemistry journal article supplement (doi:10.1039/c4sm00845f), 2014-01-01
Supplement: c4sm00845f3.pdf [file c4sm00845f3.pdf]

Supplementary Information for “Nonuniform growth and topological defects in the shaping of elastic sheets”

Nakul P. Bende,<sup>1</sup> Ryan C. Hayward,<sup>1</sup> and Christian D. Santangelo<sup>2</sup>

1 Department of Polymer Science, University of Massachusetts, Amherst MA, 01003

2 Department of Physics, University of Massachusetts, Amherst MA, 01003

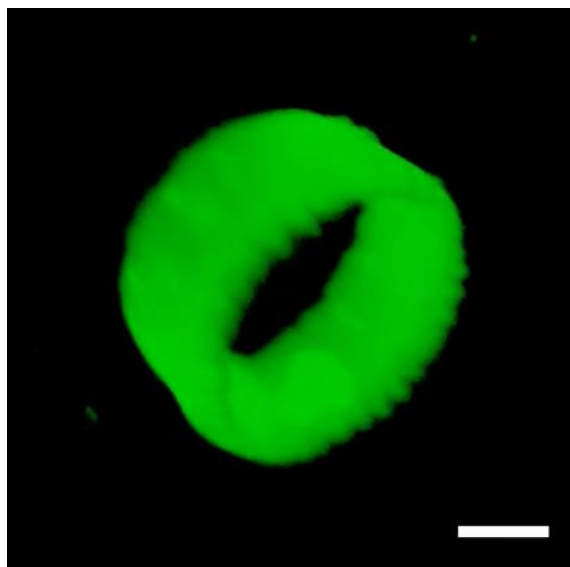

**Movie M1:** Reconstructed 3-d confocal fluorescence microscopy images of a cylinder made from *poly(N-isopropylacrylamide)* prescribed with a power law metric using halftone gel lithography [2]. (Images contain an additional piece of fluorescent gel in the frame) Scale bar: 200  $\mu\text{m}$

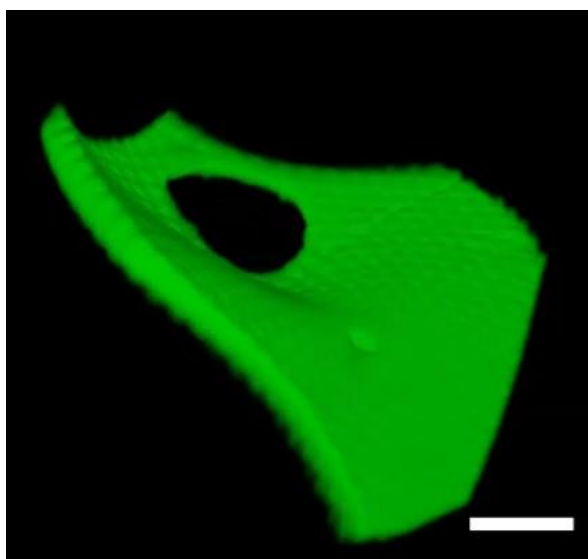

**Movie M2:** A dipole (section) made by patterning a metric with two opposite Gaussian curvature singularities. Scale bar: 200  $\mu\text{m}$
